# Supplementary material
Source: PubMed Central journal article supplement (PMC1160208)
Supplement: nar_33_suppl-2_W605__2.pdf [file nar_33_suppl-2_W605__2.pdf]

## Example of conformational entropy calculation

### Contribution to a helix nucleation transition within a « net » substructure

(scanned from the original notebook)

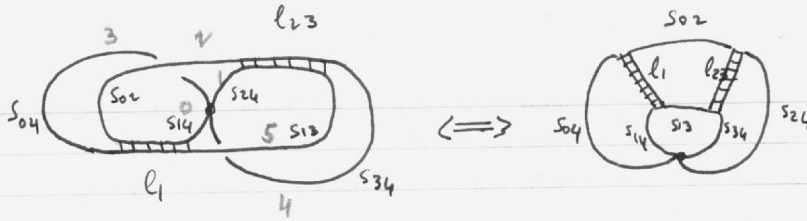

$$e^{-\beta F_{\text{tot}}} = \frac{e^{-A_1 l_1^2 - A_{123} l_{23}}}{h^9 C^{3/2}} \left. \begin{array}{l} e^{2A_{123} l_{23}} \\ e^{-A_{123} l_{23}} \\ e^{4A_{123} l_{23}} \end{array} \right\} 1 \text{ if } A_{123} l_{23} = 0$$

$$C = (s_{02} + s_{13}) (s_{24} s_{14} (s_{24} + s_{34}) + s_{24} s_{34} (s_{04} + s_{14})) + s_{02} s_{13} (s_{04} + s_{14}) (s_{24} + s_{34})$$

$$A_1 = \frac{s_{24} s_{34} (s_{04} + s_{14} + s_{02} + s_{13}) + (s_{24} + s_{34}) [s_{04} s_{14} + s_{02} s_{13} + s_{04} s_{13} + s_{14} s_{02}]}{C}$$

$$A_{123} = \frac{s_{04} s_{14} (s_{24} + s_{34} + s_{02} + s_{13}) + (s_{04} + s_{14}) [s_{24} s_{34} + s_{02} s_{13} + s_{04} s_{13} + s_{14} s_{02}]}{C}$$

$$A_{123} = \frac{s_{04} s_{14} (s_{24} + s_{34}) + s_{24} s_{34} (s_{04} + s_{14}) + s_{02} s_{14} s_{34} + s_{13} s_{04} s_{24}}{C}$$

(1)

Free energy of  $\lambda$

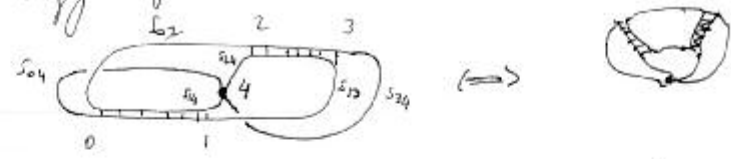

$$\int e^{-\frac{\bar{r}_4^2}{s_{04}} - \frac{(\bar{r}_4 - \bar{r}_1)^2}{s_{14}} - \frac{(\bar{r}_4 - \bar{r}_2)^2}{s_{24}} - \frac{(\bar{r}_4 - \bar{r}_3)^2}{s_{34}} - \frac{(\bar{r}_3 - \bar{r}_1)^2}{s_{13}}} e^{-\frac{s_2^2}{s_{02}}} \frac{1}{\pi^4 (s_{04} s_{14} s_{24} s_{34} s_{13} s_{02})^{3/4}} \frac{\delta(|r_1| - l)}{4\pi l^2} \frac{\delta(|r_3 - r_2| - l_{23})}{4\pi l_{23}^2} d\bar{r}_1 d\bar{r}_2 d\bar{r}_3 d\bar{r}_4$$

$$\int e^{-\bar{r}_4^2 \left( \frac{1}{s_{04}} + \frac{1}{s_{14}} + \frac{1}{s_{24}} + \frac{1}{s_{34}} \right) + 2\bar{r}_4 \cdot \left( \frac{\bar{r}_1}{s_{14}} + \frac{\bar{r}_2}{s_{24}} + \frac{\bar{r}_3}{s_{34}} \right)} e^{-\frac{\bar{r}_1^2}{s_{14}} - \bar{r}_2^2 \left( \frac{1}{s_{02}} + \frac{1}{s_{24}} \right) - \frac{\bar{r}_3^2}{s_{34}} - \frac{(\bar{r}_3 - \bar{r}_1)^2}{s_{13}}} \frac{1}{4\pi l^2} \frac{\delta(\dots)}{4\pi l_{23}^2} \frac{4}{\pi} d\bar{r}_i$$

$$\int e^{-\bar{r}_4^2 \left( \frac{1}{s_{04}} + \frac{1}{s_{14}} + \frac{1}{s_{24}} + \frac{1}{s_{34}} \right) + 2\bar{r}_4 \cdot \left( \frac{\bar{r}_1}{s_{14}} + \frac{\bar{r}_2}{s_{24}} + \frac{\bar{r}_3}{s_{34}} \right)} d\bar{r}_4 = \left[ \frac{\pi}{\frac{1}{s_{04}} + \frac{1}{s_{14}} + \frac{1}{s_{24}} + \frac{1}{s_{34}}} \right]^{3/4} e^{-\frac{\left( \frac{\bar{r}_1}{s_{14}} + \frac{\bar{r}_2}{s_{24}} + \frac{\bar{r}_3}{s_{34}} \right)^2}{\frac{1}{s_{04}} + \frac{1}{s_{14}} + \frac{1}{s_{24}} + \frac{1}{s_{34}}}}$$

(2).

$$e^{-\frac{\left(\frac{\bar{r}_1}{s_{14}} + \frac{\bar{r}_1 + 1}{s_{24} s_{34}}\right) \left(\frac{\bar{r}_3 - \bar{r}_1}{s_{34}}\right)^2}{\frac{1}{s_{24}} + \frac{1}{s_{14}} + \frac{1}{s_{24}} + \frac{1}{s_{34}}} - \frac{(\bar{r}_3 - \bar{r}_2 + \bar{r}_1)^2}{s_{34}} - \frac{(\bar{r}_3 - \bar{r}_2 + \bar{r}_2 - \bar{r}_1)^2}{s_{13}}$$

$$e^{-\frac{\bar{r}_1^2}{s_{14}} - \bar{r}_2^2 \left(\frac{1}{s_{24}} + \frac{1}{s_{24}}\right)} \frac{\int (|\bar{r}_3 - \bar{r}_2| - \ln 2) d(\bar{r}_3 - \bar{r}_2)}{\ln^2 2}$$

$$e^{-\left(\bar{r}_3 - \bar{r}_2\right)^2 \left[ \frac{1}{s_{24}} + \frac{1}{s_{13}} - \frac{1}{s_{34}^2 \left(\frac{1}{s_{24}} + \frac{1}{s_{14}} + \frac{1}{s_{24}} + \frac{1}{s_{34}}\right)} \right]}$$

$$e^{-2(\bar{r}_3 - \bar{r}_2) \left[ \frac{\bar{r}_2}{s_{34}} + \frac{\bar{r}_2 - \bar{r}_1}{s_{13}} - \frac{\frac{\bar{r}_1}{s_{14}} + \bar{r}_2 \left(\frac{1}{s_{14}} + \frac{1}{s_{34}}\right)}{s_{34} \left(\frac{1}{s_{24}} + \frac{1}{s_{14}} + \frac{1}{s_{24}} + \frac{1}{s_{34}}\right)} \right]}$$

$$e^{-\frac{\bar{r}_1^2}{s_{14}} - \bar{r}_2^2 \left(\frac{1}{s_{24}} + \frac{1}{s_{24}}\right) + \left(\frac{\bar{r}_1}{s_{14}} + \bar{r}_2 \left(\frac{1}{s_{24}} + \frac{1}{s_{34}}\right)\right)^2 \frac{1}{\frac{1}{s_{24}} + \frac{1}{s_{14}} + \frac{1}{s_{24}} + \frac{1}{s_{34}}}}$$

$$e^{-\frac{\bar{r}_2^2}{s_{34}} - \frac{(\bar{r}_2 - \bar{r}_1)^2}{s_{13}}} \frac{\int (|\bar{r}_3 - \bar{r}_2| - \ln 2) d(\bar{r}_3 - \bar{r}_2)}{\ln^2 2}$$

$$\left[ \frac{1}{s_{24}} + \frac{1}{s_{13}} - \frac{1}{s_{34}^2 \left(\frac{1}{s_{24}} + \frac{1}{s_{14}} + \frac{1}{s_{24}} + \frac{1}{s_{34}}\right)} \right]$$

$$= \frac{\frac{1}{s_{24}} + \frac{1}{s_{14}} + \frac{1}{s_{24}}}{s_{34} \left(\frac{1}{s_{24}} + \frac{1}{s_{14}} + \frac{1}{s_{24}} + \frac{1}{s_{34}}\right)} + \frac{1}{s_{13}}$$

$$= \frac{s_{24} s_{14} + s_{14} s_{24} + s_{24} s_{24}}{s_{24} s_{14} s_{24} + s_{34} (s_{24} s_{14} + s_{14} s_{24} + s_{24} s_{24})} + \frac{1}{s_{13}}$$

$$= \frac{(s_{24} + s_{13}) \left( \frac{1}{s_{24}} + \frac{1}{s_{14}} + \frac{1}{s_{24}} \right) + s_{24} s_{14} s_{24}}{s_{13} [s_{24} s_{14} s_{24} + s_{34} ( \quad )]} \quad (c)$$

3)

$$-2(\bar{\Gamma}_3 - \bar{\Gamma}_2) \cdot \left[ \bar{\Gamma}_2 \left( \frac{1}{S_{34}} + \frac{1}{S_{13}} - \frac{\frac{1}{S_{24}} + \frac{1}{S_{34}}}{S_{24} \left( \frac{1}{S_{24}} + \frac{1}{S_{14}} + \frac{1}{S_{24}} + \frac{1}{S_{34}} \right)} \right) - \bar{\Gamma}_1 \left( \frac{1}{S_{13}} + \frac{1}{S_{14} S_{34} \left( \frac{1}{S_{24}} + \frac{1}{S_{14}} + \frac{1}{S_{24}} + \frac{1}{S_{34}} \right)} \right) \right]$$

$$-2(\bar{\Gamma}_3 - \bar{\Gamma}_2) \cdot \left[ \bar{\Gamma}_2 \left( \frac{\frac{1}{S_{24}} + \frac{1}{S_{14}}}{S_{24} \left( \frac{1}{S_{24}} + \frac{1}{S_{14}} + \frac{1}{S_{24}} + \frac{1}{S_{34}} \right)} + \frac{1}{S_{13}} \right) - \bar{\Gamma}_1 \left( \frac{S_{24} S_{34} \left( \frac{1}{S_{24}} + \frac{1}{S_{14}} + \frac{1}{S_{24}} + \frac{1}{S_{34}} \right) + S_{13}}{S_{13} S_{14} S_{34} \left( \frac{1}{S_{24}} + \frac{1}{S_{14}} + \frac{1}{S_{24}} + \frac{1}{S_{34}} \right)} \right) \right]$$

$$-2(\bar{\Gamma}_3 - \bar{\Gamma}_2) \cdot \left[ \bar{\Gamma}_2 \left( \frac{\left( \frac{1}{S_{24}} + \frac{1}{S_{14}} \right) S_{13} + S_{34} \left( \frac{1}{S_{24}} + \frac{1}{S_{14}} + \frac{1}{S_{24}} + \frac{1}{S_{34}} \right)}{S_{24} S_{13} \left( \frac{1}{S_{24}} + \frac{1}{S_{14}} + \frac{1}{S_{24}} + \frac{1}{S_{34}} \right)} \right) - \bar{\Gamma}_1 \left( \frac{S_{24} \left( \frac{1}{S_{24}} + \frac{1}{S_{14}} + \frac{1}{S_{24}} + \frac{1}{S_{34}} \right) + S_{13} \frac{1}{S_{14}}}{S_{13} S_{34} \left( \frac{1}{S_{24}} + \frac{1}{S_{14}} + \frac{1}{S_{24}} + \frac{1}{S_{34}} \right)} \right) \right]$$

$$-2(\bar{\Gamma}_3 - \bar{\Gamma}_2) \cdot \left( \frac{\left( \frac{1}{S_{24}} + \frac{1}{S_{14}} \right) S_{13} + S_{34} \left( \frac{1}{S_{24}} + \frac{1}{S_{14}} + \frac{1}{S_{24}} + \frac{1}{S_{34}} \right)}{S_{24} S_{13} \left( \frac{1}{S_{24}} + \frac{1}{S_{14}} + \frac{1}{S_{24}} + \frac{1}{S_{34}} \right)} \right) \quad (A)$$

$$\cdot \left[ \bar{\Gamma}_2 - \bar{\Gamma}_1 \left( \frac{1 + \frac{S_{13}}{S_{34}} \frac{1}{S_{14}} \left( \frac{1}{S_{24}} + \frac{1}{S_{14}} + \frac{1}{S_{24}} + \frac{1}{S_{34}} \right)}{1 + \frac{S_{13}}{S_{34}} \left( \frac{1}{S_{14}} + \frac{1}{S_{14}} \right) \left( \frac{1}{S_{24}} + \frac{1}{S_{14}} + \frac{1}{S_{24}} + \frac{1}{S_{34}} \right)} \right) \right] \quad (B)$$

$$-2(\bar{\Gamma}_3 - \bar{\Gamma}_2) \cdot A \left[ \bar{\Gamma}_2 - \bar{\Gamma}_1 B \right]$$

(h).

$$\int e^{-k_{23}^2 C} e^{-2A k_{23} \cos \theta |\bar{r}_2 - B\bar{r}_1|} \frac{2\pi k_{23}^2}{4\pi k_{23}^2} \sin \theta d\theta$$

$$= \frac{e^{-k_{23}^2 C}}{2} \cdot \frac{e^{2A k_{23} |\bar{r}_2 - B\bar{r}_1|} - e^{-2A k_{23} |\bar{r}_2 - B\bar{r}_1|}}{4A k_{23} |\bar{r}_2 - B\bar{r}_1|}$$

$$\left\{ e^{-\frac{r_1^2}{s_{14}}} - (\bar{r}_2 - B\bar{r}_1 + B\bar{r}_1)^2 \left( \frac{1}{s_{02}} + \frac{1}{s_{24}} \right) \right. \\ \left. e^{+\frac{1}{\frac{1}{s_{04}} + \frac{1}{s_{14}} + \frac{1}{s_{24}} + \frac{1}{s_{34}}} \left[ (\bar{r}_2 - B\bar{r}_1 + B\bar{r}_1) \left( \frac{1}{s_{24}} + \frac{1}{s_{34}} \right) + \frac{r_1}{s_{14}} \right]^2} \right. \\ \left. e^{-\left( \bar{r}_2 - B\bar{r}_1 + B\bar{r}_1 \right)^2 \frac{1}{s_{34}}} - \left( \bar{r}_2 - B\bar{r}_1 + (B-1)\bar{r}_1 \right)^2 \frac{1}{s_3} \right. \\ \left. e^{-k_{23}^2 C} \frac{e^{2A k_{23} |\bar{r}_2 - B\bar{r}_1|} - e^{-2A k_{23} |\bar{r}_2 - B\bar{r}_1|}}{4A k_{23} |\bar{r}_2 - B\bar{r}_1|} d\bar{r}_1 d(\bar{r}_2 - B\bar{r}_1) \right.$$

⑤.

$$\int e^{-\tau_1^2} \left[ \frac{1}{s_4} + B^2 \left( \frac{1}{s_{02}} + \frac{1}{s_{24}} \right) - \frac{1}{\frac{1}{s_4} + \frac{1}{s_{14}} + \frac{1}{s_{24}} + \frac{1}{s_{34}}} \left( B \left( \frac{1}{s_{24}} + \frac{1}{s_{34}} \right) + \frac{1}{s_4} \right)^2 + \frac{B^2}{s_{34}} + \frac{(B-1)^2}{s_{13}} \right]$$

$$e^{-2|\bar{\tau}_2 - B\bar{\tau}_1| \cos \theta |\tau_1|} \left[ B \left( \frac{1}{s_{02}} + \frac{1}{s_{24}} \right) - \frac{\frac{1}{s_{24}} + \frac{1}{s_{34}}}{\frac{1}{s_{02}} + \frac{1}{s_4} + \frac{1}{s_{24}} + \frac{1}{s_{34}}} \left( B \left( \frac{1}{s_{24}} + \frac{1}{s_{34}} \right) + \frac{1}{s_4} \right) \right]$$

$$\left[ \frac{B}{s_{34}} + \frac{B-1}{s_{13}} \right] \textcircled{1}$$

$$e^{-(\bar{\tau}_2 - B\bar{\tau}_1)^2} \left[ \frac{1}{s_{02}} + \frac{1}{s_{24}} - \frac{\left( \frac{1}{s_{24}} + \frac{1}{s_{34}} \right)^2}{\frac{1}{s_{02}} + \frac{1}{s_4} + \frac{1}{s_{24}} + \frac{1}{s_{34}}} + \frac{1}{s_{34}} + \frac{1}{s_{13}} \right] \textcircled{2}$$

$$e^{-\tau_3^2 C}$$

$$e^{\frac{2A \tau_3 |\bar{\tau}_2 - B\bar{\tau}_1|}{4A \tau_3 |\bar{\tau}_2 - B\bar{\tau}_1|} - \frac{-2A \tau_3 |\bar{\tau}_2 - B\bar{\tau}_1|}{4A \tau_3 |\bar{\tau}_2 - B\bar{\tau}_1|}} \cdot \frac{d\bar{\tau}_1 d\bar{\tau}_2 - B\bar{\tau}_1}{s(\tau_1 - \tau_2) \ln \tau_1^2}$$

$$\rightarrow \boxed{\frac{A \cdot \textcircled{1}}{\textcircled{2}} = A \tau_3}$$

(6)

$$\textcircled{1}: \left[ B \left\{ \frac{1}{s_{02}} + \left( \frac{1}{s_{24}} + \frac{1}{s_{34}} \right) \left[ 1 - \frac{\frac{1}{s_{24}} + \frac{1}{s_{34}}}{\frac{1}{s_{04}} + \frac{1}{s_{14}} + \frac{1}{s_{24}} + \frac{1}{s_{34}}} \right] \right\} \right] \frac{1}{s_{13}}$$

$$- \frac{1}{s_{14}} \frac{\frac{1}{s_{24}} + \frac{1}{s_{34}}}{\frac{1}{s_{04}} + \frac{1}{s_{14}} + \frac{1}{s_{24}} + \frac{1}{s_{34}}} - \frac{1}{s_{13}}$$

$$= \left[ B \left\{ \frac{1}{s_{02}} + \frac{1}{s_{13}} + \frac{\left( \frac{1}{s_{24}} + \frac{1}{s_{34}} \right) \left( \frac{1}{s_{04}} + \frac{1}{s_{14}} \right)}{\frac{1}{s_{04}} + \frac{1}{s_{14}} + \frac{1}{s_{24}} + \frac{1}{s_{34}}} \right\} \right]$$

$$- \frac{1}{s_{14}} \frac{\frac{1}{s_{24}} + \frac{1}{s_{34}}}{\frac{1}{s_{04}} + \frac{1}{s_{14}} + \frac{1}{s_{24}} + \frac{1}{s_{34}}} - \frac{1}{s_{13}}$$

$$\textcircled{1} A = \left[ AB \left\{ \frac{1}{s_{02}} + \frac{1}{s_{13}} + \frac{\left( \frac{1}{s_{24}} + \frac{1}{s_{34}} \right) \left( \frac{1}{s_{04}} + \frac{1}{s_{14}} \right)}{\frac{1}{s_{04}} + \frac{1}{s_{14}} + \frac{1}{s_{24}} + \frac{1}{s_{34}}} \right\} \right]$$

$$- A \left( \frac{1}{s_{13}} + \frac{1}{s_{14}} \frac{\frac{1}{s_{24}} + \frac{1}{s_{34}}}{\frac{1}{s_{04}} + \frac{1}{s_{14}} + \frac{1}{s_{24}} + \frac{1}{s_{34}}} \right)$$

$$A = \frac{1}{s_{13}} + \frac{\frac{1}{s_{04}} + \frac{1}{s_{14}}}{s_{34} \left( \frac{1}{s_{04}} + \frac{1}{s_{14}} + \frac{1}{s_{24}} + \frac{1}{s_{34}} \right)}$$

$$AB = \frac{1}{s_{13}} + \frac{\frac{1}{s_{14}}}{s_{34} \left( \frac{1}{s_{04}} + \frac{1}{s_{14}} + \frac{1}{s_{24}} + \frac{1}{s_{34}} \right)}$$

$$\textcircled{2} = \frac{1}{s_{02}} + \frac{1}{s_{13}} + \frac{\left( \frac{1}{s_{24}} + \frac{1}{s_{34}} \right) \left( \frac{1}{s_{04}} + \frac{1}{s_{14}} \right)}{\frac{1}{s_{04}} + \frac{1}{s_{14}} + \frac{1}{s_{24}} + \frac{1}{s_{34}}}$$

(P)

$$\frac{\textcircled{1} A}{\textcircled{2}} = AB - \frac{A}{\textcircled{2}} \left( \frac{\frac{1}{s_3} + \frac{1}{s_4} \frac{\frac{1}{s_{24}} + \frac{1}{s_{34}}}{\frac{1}{s_{24}} + \dots + \frac{1}{s_{34}}}}{\dots} \right)$$

$$A \left[ \begin{array}{c} \frac{1}{s_3} ( \quad ) + \frac{1}{s_{24}} \left( \frac{1}{s_{24}} + \frac{1}{s_{34}} \right) \\ \frac{1}{s_3} ( \quad ) + \frac{1}{s_{34}} \left( \frac{1}{s_{24}} + \frac{1}{s_{34}} \right) \end{array} \right]$$

$$\frac{1}{\textcircled{2}} = \frac{( \quad )}{\left( \frac{1}{s_{22}} + \frac{1}{s_{13}} \right) ( \quad ) + \left( \frac{1}{s_{24}} + \frac{1}{s_{34}} \right) \left( \frac{1}{s_{24}} + \frac{1}{s_{34}} \right)}$$

$$\frac{A \left[ \begin{array}{c} \frac{1}{s_3} ( \quad ) + \frac{1}{s_{24}} \left( \frac{1}{s_{24}} + \frac{1}{s_{34}} \right) \\ \frac{1}{s_3} ( \quad ) + \frac{1}{s_{34}} \left( \frac{1}{s_{24}} + \frac{1}{s_{34}} \right) \end{array} \right]}{\textcircled{2}} = \frac{( \quad ) \left[ \left( \frac{1}{s_{22}} + \frac{1}{s_{13}} \right) ( \quad ) + \left( \frac{1}{s_{24}} + \frac{1}{s_{34}} \right) \left( \frac{1}{s_{24}} + \frac{1}{s_{34}} \right) \right]}{\dots}$$

$$AB = \frac{\frac{1}{s_{13}} ( \quad ) + \frac{1}{s_{34}} \frac{1}{s_{34}}}{( \quad )}$$

$$AB - \frac{A \left[ \begin{array}{c} \frac{1}{s_3} ( \quad ) + \frac{1}{s_{24}} \left( \frac{1}{s_{24}} + \frac{1}{s_{34}} \right) \\ \frac{1}{s_3} ( \quad ) + \frac{1}{s_{34}} \left( \frac{1}{s_{24}} + \frac{1}{s_{34}} \right) \end{array} \right]}{\textcircled{2}} = \frac{- \left[ \frac{1}{s_{13}} ( \quad ) + \frac{1}{s_{34}} \frac{1}{s_{34}} \right] \left[ \left( \frac{1}{s_{22}} + \frac{1}{s_{13}} \right) ( \quad ) + \left( \frac{1}{s_{24}} + \frac{1}{s_{34}} \right) \left( \frac{1}{s_{24}} + \frac{1}{s_{34}} \right) \right]}{( \quad ) \left[ \begin{array}{c} \dots \\ \dots \end{array} \right]}$$



... 8

$$AB - \frac{AEI}{l^3} = \frac{1}{s_{13}} \frac{1}{s_{02}} \left( \right)^2$$
$$\frac{1}{s_{13}} \left( \right) \left\{ -\frac{1}{s_{14}} \left( \frac{1}{s_{24}} + \frac{1}{s_{34}} \right) - \frac{1}{s_{34}} \left( \frac{1}{s_{04}} + \frac{1}{s_{14}} \right) + \left( \frac{1}{s_{04}} + \frac{1}{s_{14}} \right) \left( \frac{1}{s_{24}} + \frac{1}{s_{34}} \right) + \frac{1}{s_{14}} \frac{1}{s_{34}} \right\}$$

$$\frac{1}{s_{02}} \left( \right) \frac{1}{s_{14}} \frac{1}{s_{34}}$$

$$- \frac{1}{s_{14}} \frac{1}{s_{34}} \left( \frac{1}{s_{04}} + \frac{1}{s_{14}} \right) \left( \frac{1}{s_{24}} + \frac{1}{s_{34}} \right)$$

$$+ \frac{1}{s_{14}} \frac{1}{s_{34}} \left( \frac{1}{s_{04}} + \frac{1}{s_{14}} \right) \left( \frac{1}{s_{24}} + \frac{1}{s_{34}} \right)$$

$$\left( \right) \left[ \frac{1}{s_{02}} \frac{1}{s_{14}} \frac{1}{s_{34}} \right]$$

$$= \frac{1}{s_{13}} \frac{1}{s_{02}} \left( \right)^2 + \frac{1}{s_{13}} \frac{1}{s_{04}} \frac{1}{s_{24}} \left( \right) + \frac{1}{s_{34}} \frac{1}{s_{14}} \frac{1}{s_{02}} \left( \right)$$

$$\left( \right) \left[ \frac{1}{s_{02}} \frac{1}{s_{14}} \frac{1}{s_{34}} \right]$$

$$= \frac{1}{s_{13}} \frac{1}{s_{02}} \left( \right) + \frac{1}{s_{13}} \cdot \frac{1}{s_{04}} \frac{1}{s_{24}} + \frac{1}{s_{02}} \cdot \frac{1}{s_{14}} \cdot \frac{1}{s_{34}}$$

$$\left( \frac{1}{s_{02}} + \frac{1}{s_{13}} \right) \left( \right) + \left( \frac{1}{s_{04}} + \frac{1}{s_{14}} \right) \left( \frac{1}{s_{24}} + \frac{1}{s_{34}} \right)$$

$$(9) \therefore \quad \times s_{13} s_{12} s_{04} s_{14} s_{24} s_{34}.$$

$$AB - A \begin{matrix} \rightarrow \\ \rightarrow \\ \rightarrow \end{matrix} \stackrel{(2)}{=} \frac{\{s_{14} s_{24} s_{34} + s_{04} s_{24} s_{34} + s_{04} s_{14} s_{34} + s_{04} s_{14} s_{24}\} + s_{02} s_{14} s_{34} + s_{13} s_{04} s_{24}}{(s_{02} + s_{13}) \{ \quad \} + s_{02} s_{13} (s_{04} + s_{14}) (s_{24} + s_{34})}$$

$$= \frac{\{ \quad \} + s_{02} s_{14} s_{34} + s_{13} s_{04} s_{24}}{(s_{02} + s_{13}) (s_{04} + s_{14}) (s_{24} + s_{34})} \left[ s_{02} // s_{13} + s_{04} // s_{14} + s_{24} // s_{34} \right].$$

$$C = (s_{02} + s_{13}) \{ s_{14} s_{24} s_{34} + s_{04} s_{24} s_{34} + s_{04} s_{14} s_{34} + s_{04} s_{14} s_{24} \} + s_{02} s_{13} (s_{04} + s_{14}) (s_{24} + s_{34}).$$

$$A_{R3} = \{ s_{14} s_{24} s_{34} + s_{04} s_{24} s_{34} + s_{04} s_{14} s_{34} + s_{04} s_{14} s_{24} \} + s_{02} s_{14} s_{34} + s_{13} s_{04} s_{24}.$$

$$C = (s_{02} + s_{13}) (s_{04} + s_{14}) (s_{24} + s_{34}) \left[ s_{02} // s_{13} + s_{04} // s_{14} + s_{24} // s_{34} \right]$$

(b)...

$l_{23} \rightarrow 0$

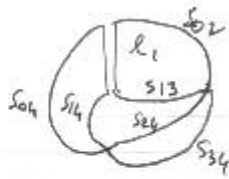

Fact.  $\left\{ \begin{array}{l} s_{12} \rightarrow s_{13} \\ s_{34} \rightarrow s_{24} // s_{34} \end{array} \right.$

$$A_1 = \frac{s_{24} s_{34} (s_{04} + s_{14} + s_{02} + s_{13}) + (s_{24} + s_{34}) (s_{04} s_{14} + s_{02} s_{13} + s_{04} s_{13} + s_{14} s_{02})}{(s_{04} s_{14} (s_{24} + s_{34}) + (s_{04} + s_{14}) s_{24} s_{34}) (s_{02} + s_{13}) + s_{02} s_{13} (s_{04} + s_{14}) (s_{24} + s_{34})}$$

$l_1 \rightarrow 0$

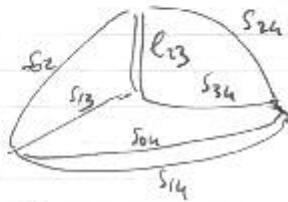

As previous with  $\begin{array}{l} s_{04} \leftrightarrow s_{24} \\ s_{14} \leftrightarrow s_{34} \end{array}$

$$A_{23} = \frac{s_{04} s_{14} (s_{24} + s_{34} + s_{02} + s_{13}) + (s_{04} + s_{14}) (s_{12} s_{34} + s_{02} s_{13} + s_{24} s_{13} + s_{34} s_{02})}{C}$$
